# Supplementary material
Source: Springer Nature journal article supplement (http://www.springermedizin.de/resource/supplementary/12883_2011_527_MOESM2_ESM.pdf/9455332)

Headache days / Month

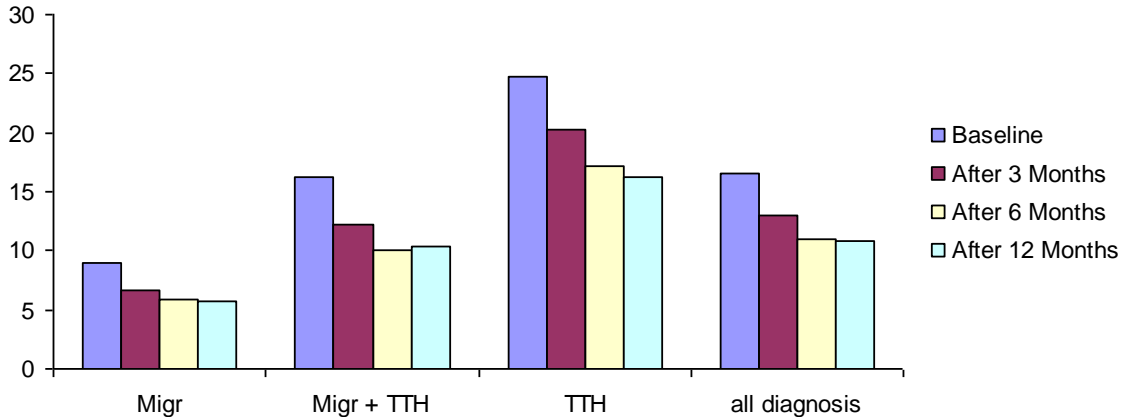

Supplement: MOESM2 [file 9455332]
